# Supplementary material for: Investigation on the structural, magnetic, magnetocaloric and magnetotransport behaviour of La0.7Sr0.3MnO3 manganites synthesised by different routes
Source: Royal Society of Chemistry journal article supplement (doi:10.1039/d3cp05554j), 2024-01-01
Supplement: d3cp05554j1.pdf [file d3cp05554j1.pdf]

## Supplementary information

### Investigation on the structural, magnetic, magnetocaloric and magnetotransport behaviour in $\text{La}_{0.7}\text{Sr}_{0.3}\text{MnO}_3$ manganites synthesised by different routes

Bhagya Uthaman<sup>1,2\*</sup>, V R Akshay<sup>2,3</sup>, Manoj Raama Varma<sup>2</sup>

<sup>1</sup>Department of Physics, Fatima Mata National College, Kollam-691001, Kerala, India

<sup>2</sup>Materials Science and Technology Division, National Institute for Interdisciplinary Science and Technology (NIIST)-CSIR, Thiruvananthapuram-695019, Kerala, India

<sup>3</sup>Mandelbrot Systems Pvt. Ltd., Thiruvananthapuram-695032, Kerala, India

\*Corresponding Author: [bhagya@fmnc.ac.in](mailto:bhagya@fmnc.ac.in)

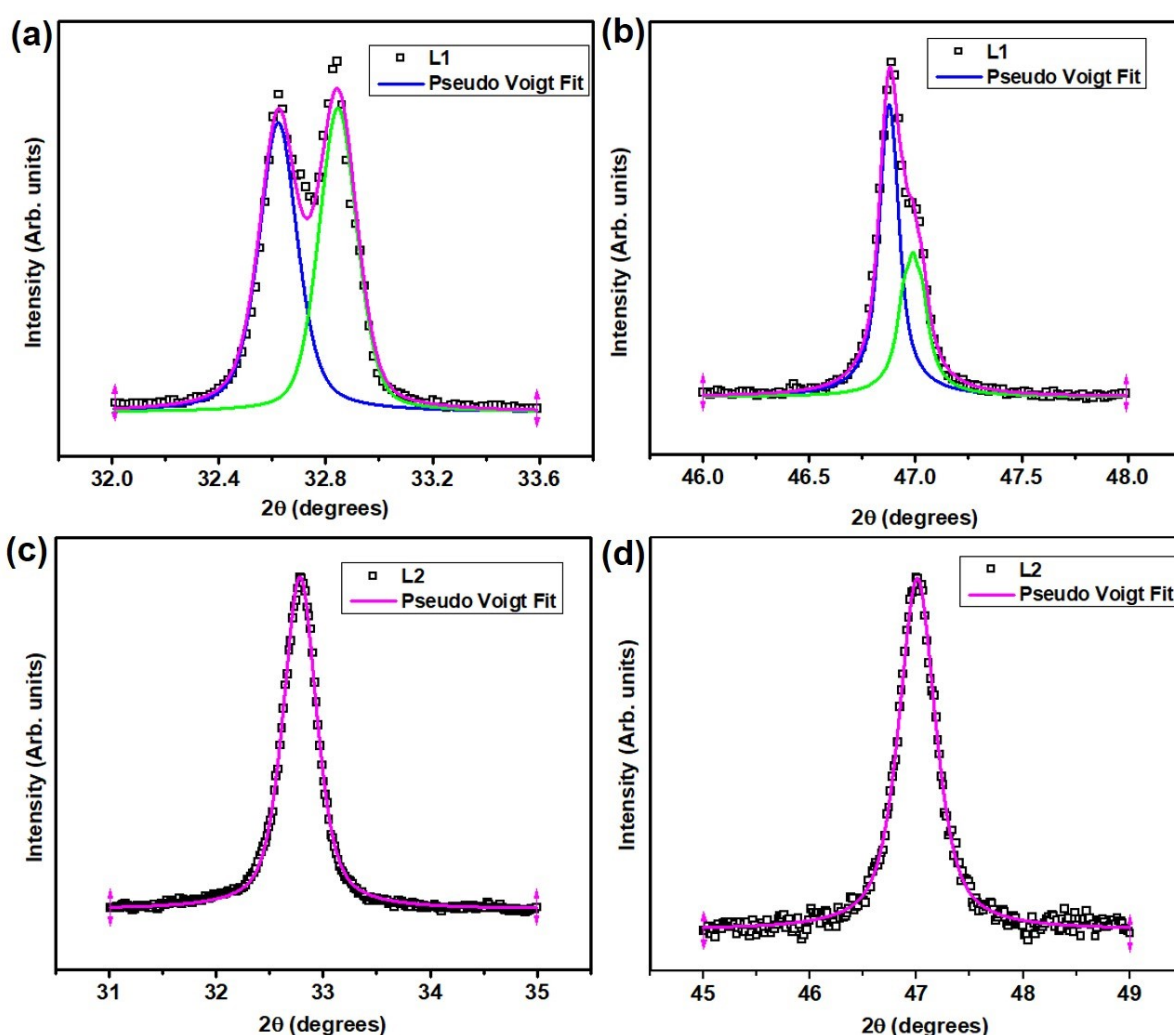

**Fig. S1:** Peak fitting of the XRD peaks to estimate the crystallite size (a, b) Bulk sample L1, (c,d) Nanocrystalline sample L2.

Using silicon standard, we have corrected the FWHM for instrumental broadening and then calculated the FWHM using the relation

$$\beta_{corrected} = (\beta_{observed}^2 - \beta_{instrumental}^2)^{1/2}$$

The crystallite size has been determined using Debye Scherrer equation 
$$t = \frac{0.9 \lambda}{\beta_{hkl} \cos \theta_{hkl}}$$

where  $\lambda$  is the wavelength of the X-rays used,  $\beta_{hkl}$  is the full width at half maximum (FWHM), and  $\theta$  is the Bragg angle.

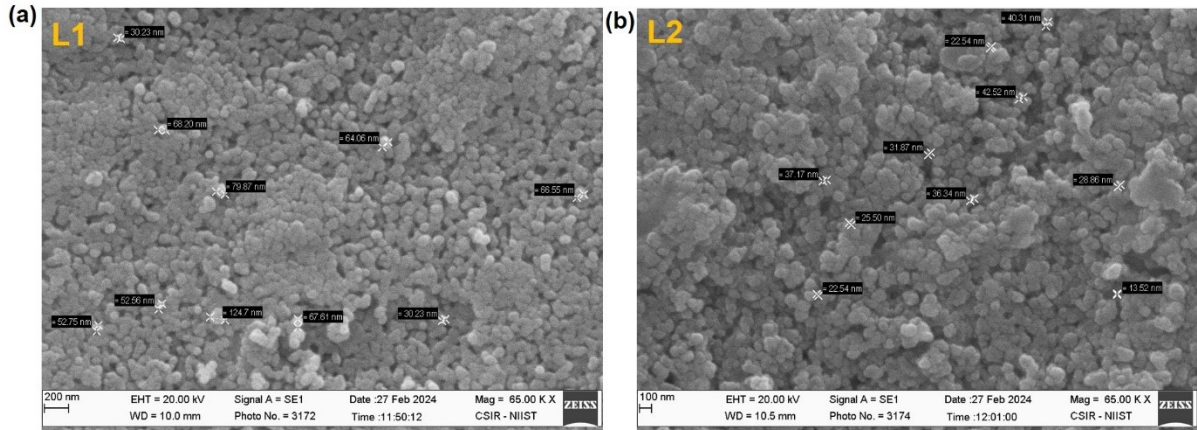

Fig S2: SEM images with grain sizes marked for (a) L1 and (b) L2

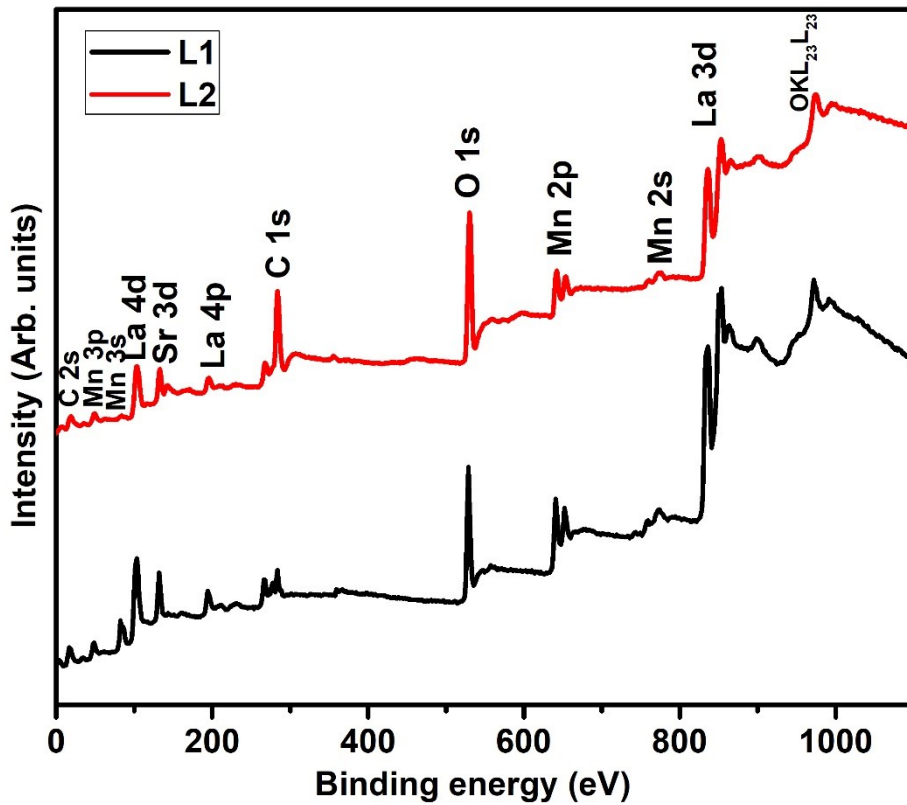

Fig. S3: XPS Survey scan of samples L1 and L2

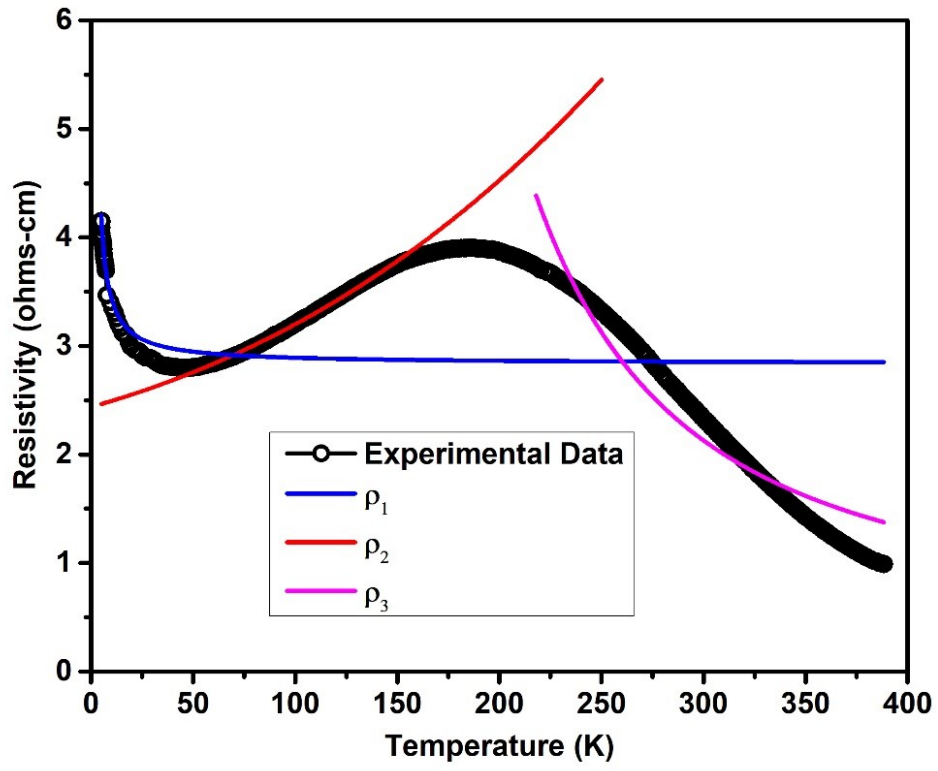

Fig. S4: Curves of observed  $\rho$ ,  $\rho_1$ ,  $\rho_2$  and  $\rho_3$
